# Supplementary material
Source: MDPI journal article supplement (https://www.mdpi.com/2079-6412/9/2/83)
Supplement: s1 [file s1]

## Supplementary Materials

**Table S1.** Properties of the employed solvent.

| Solvent        | Properties                                    |                   |           |                             |
|----------------|-----------------------------------------------|-------------------|-----------|-----------------------------|
|                | Chemical Formula                              | Boling Point (°C) | REL (ppm) | Solubility in Water (wt %)* |
| Ethanol        | C <sub>2</sub> H <sub>6</sub> O               | 78.4              | 1000      | ∞                           |
| Butanol        | C <sub>4</sub> H <sub>10</sub> O              | 100               | 100       | 44.1                        |
| n-butylacetate | C <sub>6</sub> H <sub>12</sub> O <sub>2</sub> | 127               | 150       | 1.86                        |

REL: Recommended Exposure Limits, the concentration not to be exceed, mediated in a 40-h working week (US legislation). \* These values are reported in percentage and are expressed in weight (g/g): g of solvent in 100 g of water. The symbol ∞ indicates that the solvent is completely miscible.

**Table S2.** Summary of coating results of all products, for all RH% conditions and all time intervals.

| Sample   | Phase Identified with XRD/μFT-IR Analyses |          |         |           | Amorphous Calcium Carbonate |
|----------|-------------------------------------------|----------|---------|-----------|-----------------------------|
|          | Portlandite                               | Vaterite | Calcite | Aragonite |                             |
| 2BU50 2W | –                                         | ✓        | –       | –         | –                           |
| 2BU90 2W | –                                         | ✓        | ✓       | –         | –                           |
| 2BU50 1M | –                                         | ✓        | –       | –         | –                           |
| 2BU90 1M | –                                         | ✓        | ✓       | –         | –                           |
| 2BU50 3M | –                                         | ✓        | –       | –         | –                           |
| 2BU90 3M | –                                         | ✓        | ✓       | –         | –                           |
| NBU50 2W | –                                         | –        | –       | –         | ✓                           |
| NBU90 2W | –                                         | ✓        | ✓       | –         | –                           |
| NBU50 1M | –                                         | –        | –       | –         | ✓                           |
| NBU90 1M | –                                         | ✓        | –       | –         | –                           |
| NBU50 3M | –                                         | ✓        | –       | –         | –                           |
| NBU90 3M | –                                         | ✓        | –       | –         | –                           |
| ETA50 2W | ✓                                         | ✓        | –       | –         | –                           |
| ETA90 2W | ✓                                         | ✓        | ✓       | –         | –                           |
| ETA50 1M | –                                         | ✓        | –       | –         | –                           |
| ETA90 1M | –                                         | ✓        | ✓       | –         | –                           |
| ETA50 3M | –                                         | ✓        | –       | –         | –                           |
| ETA90 3M | –                                         | ✓        | ✓       | –         | –                           |
| CAL50 2W | –                                         | –        | –       | ✓         | –                           |
| CAL90 2W | –                                         | ✓        | ✓       | –         | –                           |
| CAL50 1M | –                                         | –        | –       | ✓         | –                           |
| CAL90 1M | –                                         | ✓        | ✓       | –         | –                           |
| CAL50 3M | –                                         | –        | –       | ✓         | –                           |
| CAL90 3M | –                                         | ✓        | ✓       | –         | –                           |

2BU: Ca(OEt)<sub>2</sub> diluted in 2-butanol; NBU: Ca(OEt)<sub>2</sub> diluted in n-butylacetate; ETA: Ca(OEt)<sub>2</sub> diluted in ethanol; CAL: CaLoSil. 2W: two weeks; 1M: one month; 3M: three months. 50: 50% RH; 90: 90% RH.

**Table S3.** Summary of the main vibrational bands associated to calcium carbonate polymorphs identified in this study by  $\mu$ FT-IR. Spectral range 700–1100  $\text{cm}^{-1}$ .

| Spectral Band ( $\text{cm}^{-1}$ ) | Calcium Carbonate Polymorphs |          |                             |
|------------------------------------|------------------------------|----------|-----------------------------|
|                                    | Calcite                      | Vaterite | Amorphous Calcium Carbonate |
| 712                                | ✓                            | –        | –                           |
| 741/744/747                        | –                            | ✓        | –                           |
| 864                                | –                            | –        | ✓                           |
| 876                                | ✓                            | –        | –                           |
| 873/877                            | –                            | ✓        | –                           |
| 1070                               | –                            | –        | ✓                           |
| 1088/1089                          | –                            | ✓        | –                           |

**Table S4.** Amount of dry matter retained after one month for all stones treated with both application procedures and all products.

| Application | Quantity of Dry Matter Retained ( $\text{kg/m}^2$ ) |             |             |                   |
|-------------|-----------------------------------------------------|-------------|-------------|-------------------|
|             | ETA                                                 | 2BU         | NBU         | CAL               |
| Lecce_AP1   | 0.063–0.067                                         | 0.046–0.056 | 0.077–0.085 | 0.010–0.014       |
| Lecce_AP2   | 0.067                                               | 0.034       | 0.097       | 0.086             |
| Noto_AP1    | 0.009–0.079                                         | <0.010 *    | 0.008–0.136 | 0.065 $\pm$ 0.103 |
| Noto_AP2    | 0.107                                               | 0.478       | 0.235       | 0.138             |
| Vicenza_AP1 | 0.010–0.014                                         | 0.034–0.068 | 0.062–0.090 | 0.170–0.240       |
| Vicenza_AP2 | 0.230                                               | 0.357       | 0.463       | 0.154             |

AP1: brush till saturation; AP2: absorption by capillarity. \* For this sample, the quantity of product was very low to be measured with the available scale.

**Table S5.** Ultrasound pulse velocity values obtained from Lecce stone before and after treatment. The depth profile is expressed from treated (5 mm) to not treated surface (45 mm).

| Depth (mm) | Values of Ultrasound Pulse Velocity (m/s) |                   |                   |                   |
|------------|-------------------------------------------|-------------------|-------------------|-------------------|
|            | NT                                        | NBU_AP1           | NT                | NBU_AP2           |
| 5          | 3613.3 $\pm$ 55.1                         | 3710 $\pm$ 17.3   | 3636.7 $\pm$ 68.1 | 3693.3 $\pm$ 28.9 |
| 10         | 3546.7 $\pm$ 11.5                         | 3700 $\pm$ 17.3   | 3713.3 $\pm$ 25.2 | 3706.7 $\pm$ 56.9 |
| 15         | 3590 $\pm$ 0                              | 3673.3 $\pm$ 56.9 | 3633.3 $\pm$ 68.1 | 3713.3 $\pm$ 25.2 |
| 20         | 3563.3 $\pm$ 25.1                         | 3683.3 $\pm$ 11.5 | 3670 $\pm$ 96.4   | 3786.7 $\pm$ 28.9 |
| 25         | 3546.7 $\pm$ 40.4                         | 3646.7 $\pm$ 63.5 | 3643.3 $\pm$ 76.4 | 3723.3 $\pm$ 41.6 |
| 30         | 3580.0 $\pm$ 36.1                         | 3636.7 $\pm$ 46.2 | 3626.7 $\pm$ 28.8 | 3676.7 $\pm$ 85.1 |
| 35         | 3546.7 $\pm$ 51.3                         | 3580 $\pm$ 17.3   | 3643.3 $\pm$ 98.7 | 3720 $\pm$ 17.3   |
| 40         | 3570 $\pm$ 36.1                           | 3543.3 $\pm$ 28.9 | 3633.3 $\pm$ 25.2 | 3706.7 $\pm$ 85.1 |
| 45         | 3590.0 $\pm$ 0                            | 3616.7 $\pm$ 92.9 | 3713.3 $\pm$ 25.2 | 3780 $\pm$ 36.6   |

NT: untreated stone; NBU:  $\text{Ca}(\text{OEt})_2$  diluted in n-butylacetate; AP1: brushing till saturation; AP2: absorption by capillarity.

**Table S6.** Chromatic variation after both types of application procedures, for all stones treated with all products.

| Application | $\Delta E^*$   |                |               |                |
|-------------|----------------|----------------|---------------|----------------|
|             | ETA            | 2BU            | NBU           | CAL            |
| Lecce_AP1   | 2.8 $\pm$ 0.8  | 7.1 $\pm$ 0.5  | 6.1 $\pm$ 0.5 | 12.4 $\pm$ 0.2 |
| Lecce_AP2   | 11.2 $\pm$ 0.3 | 15.3 $\pm$ 0.2 | 7.7 $\pm$ 0.3 | 8.5 $\pm$ 0.4  |
| Noto_AP1    | 4.9 $\pm$ 0.5  | 8.7 $\pm$ 0.4  | 5.3 $\pm$ 0.4 | 16.6 $\pm$ 0.2 |
| Noto_AP2    | 9.9 $\pm$ 0.2  | 13.9 $\pm$ 0.3 | 6.5 $\pm$ 0.4 | 11.4 $\pm$ 0.2 |
| Vicenza_AP1 | 2.1 $\pm$ 1.3  | 1.1 $\pm$ 0.5  | 3.3 $\pm$ 1.9 | 6.9 $\pm$ 0.3  |
| Vicenza_AP2 | 1.9 $\pm$ 0.9  | 0.6 $\pm$ 2.1  | 1.0 $\pm$ 1.6 | 7.2 $\pm$ 0.3  |

AP1: brush till saturation; AP2: absorption by capillarity.

**Table S7.** Ultrasound pulse velocity values obtained from Noto stone before and after treatment. The depth profile is expressed from treated (5 mm) to not treated surface (45 mm).

| Depth (mm) | Values of Ultrasound Pulse Velocity (m/s) |               |               |               |               |               |               |               |
|------------|-------------------------------------------|---------------|---------------|---------------|---------------|---------------|---------------|---------------|
|            | NT                                        | NBU_AP1       | NT            | NBU_AP2       | NT            | 2BU_AP2       | NT            | ETA_AP2       |
| 5          | 3016.7 ± 25.2                             | 3033.3 ± 41.6 | 3080 ± 20     | 3303.3 ± 58.6 | 3020 ± 0      | 3033.3 ± 30.5 | 3253.3 ± 23.1 | 3286.7 ± 30.5 |
|            | 2980 ± 26.5                               | 3043 ± 47.3   | 3120 ± 20     | 3336.7 ± 47.3 | 3033.3 ± 23.1 | 3063.3 ± 25.2 | 3240 ± 0      | 3220 ± 34.6   |
| 10         | 2950 ± 0                                  | 2953.3 ± 90.7 | 3033.3 ± 11.5 | 3313.3 ± 11.5 | 3033.3 ± 23.1 | 3063.3 ± 25.2 | 3166.7 ± 11.5 | 3186.7 ± 11.5 |
|            | 2906.7 ± 11.5                             | 3026.7 ± 30.5 | 3033.3 ± 23.1 | 3220 ± 0      | 3053.3 ± 11.5 | 3040 ± 20     | 3100 ± 34.6   | 3093.3 ± 46.2 |
| 15         | 2900 ± 52.9                               | 2940 ± 79.3   | 3013.3 ± 25.2 | 3266.7 ± 30.5 | 3033.3 ± 23.1 | 3043.3 ± 25.2 | 3133 ± 23.1   | 3146.7 ± 61.1 |
|            | 2906.7 ± 11.5                             | 2963.3 ± 11.5 | 2953.3 ± 15.3 | 3266.7 ± 11.5 | 2996.7 ± 37.9 | 2990 ± 17.3   | 3166.3 ± 30.5 | 3126.7 ± 23.1 |
| 20         | 2936.7 ± 5.3                              | 2980 ± 34.6   | 2956.7 ± 11.5 | 3146.7 ± 80.8 | 2990 ± 26.5   | 3033.3 ± 11.5 | 3146.7 ± 30.5 | 3153.3 ± 41.6 |
|            | 2936.7 ± 28.9                             | 2990 ± 36.1   | 2986.7 ± 35.1 | 3146.7 ± 41.6 | 3026.7 ± 11.5 | 3070 ± 36.1   | 3120 ± 52.9   | 3126.7 ± 57.7 |
| 25         | 2920 ± 0                                  | 2980 ± 26.5   | 3016.7 ± 5.7  | 3073.3 ± 61.1 | 3070 ± 36.1   | 3093.3 ± 47.3 | 3180 ± 34.6   | 3226.7 ± 30.5 |
|            |                                           |               |               |               |               |               |               |               |

NT: untreated stone; NBU: Ca(OEt)<sub>2</sub> diluted in n-butylacetate; 2BU: Ca(OEt)<sub>2</sub> diluted in 2-butanol; ETA: Ca(OEt)<sub>2</sub> diluted in ethanol. AP1: brushing till saturation; AP2: absorption by capillarity.

**Table S8.** Ultrasound pulse velocity values obtained from Vicenza stone before and after treatment. The depth profile is expressed from treated (5 mm) to not treated surface (45 mm).

| Depth (mm) | Values of Ultrasound Pulse Velocity (m/s) |               |               |               |
|------------|-------------------------------------------|---------------|---------------|---------------|
|            | NT                                        | 2BU_AP1       | NT            | NBU_AP2       |
| 5          | 3293.3 ± 45.1                             | 3380 ± 20     | 3053.3 ± 23.1 | 3280 ± 52.9   |
| 10         | 3256.7 ± 23.1                             | 3276.7 ± 11.5 | 3053.3 ± 41.6 | 3316.7 ± 42.3 |
| 15         | 3263.3 ± 23.1                             | 3210 ± 34.6   | 3086.7 ± 30.5 | 3293.3 ± 11.5 |
| 20         | 3196.7 ± 30.5                             | 3223.3 ± 11.5 | 3023.3 ± 15.3 | 3190 ± 0      |
| 25         | 3210 ± 34.6                               | 3243.3 ± 11.5 | 3046.7 ± 11.5 | 3246.7 ± 30.6 |
| 30         | 3230 ± 20                                 | 3250 ± 20     | 3086.7 ± 80.8 | 3246.7 ± 11.5 |
| 35         | 3210 ± 20                                 | 3256.7 ± 23.1 | 3026.7 ± 80.8 | 3123.3 ± 76.3 |
| 40         | 3256.7 ± 11.5                             | 3183.3 ± 11.5 | 3033.3 ± 41.6 | 3126.7 ± 41.6 |
| 45         | 3236.7 ± 11.5                             | 3230 ± 20     | 3073.3 ± 50.3 | 3053.3 ± 61.1 |

NT: untreated stone; 2BU: Ca(OEt)<sub>2</sub> diluted in 2-butanol; NBU: Ca(OEt)<sub>2</sub> diluted in n-butylacetate; AP1: brushing till saturation; AP2: absorption by capillarity.

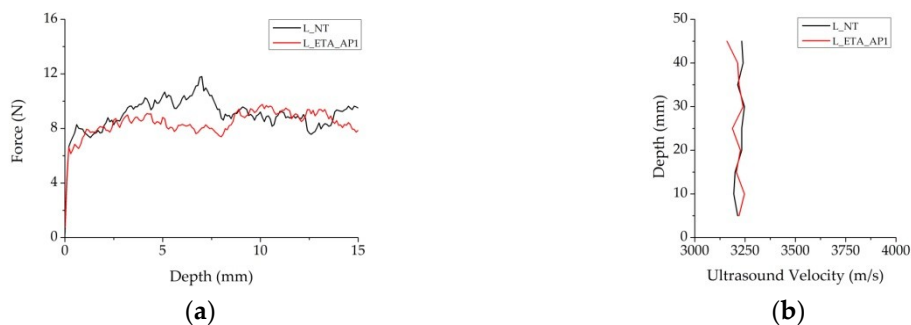

**Figure S1.** Lecce stone treated with ETA applied by brushing till saturation AP1 (L\_ETA\_API1): (a) drilling resistance and (b) UPV profile. NT: untreated part of the stone for DRMS and untreated stone for UPV.

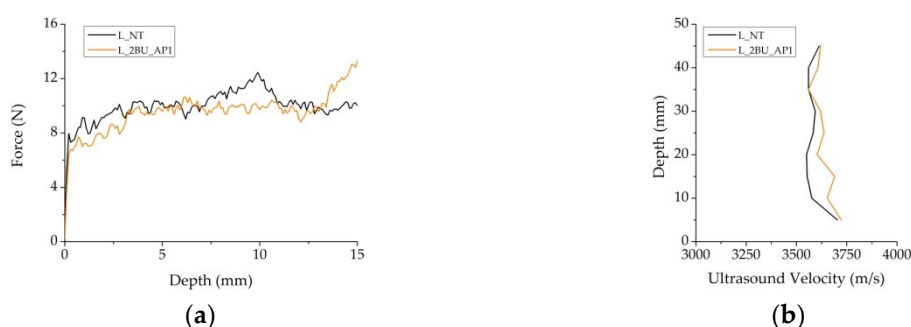

**Figure S2.** Lecce stone treated with 2BU applied by brushing till saturation AP1 (L\_2BU\_API1): (a) drilling resistance and (b) UPV profile. NT: untreated part of the stone for DRMS and untreated stone for UPV.

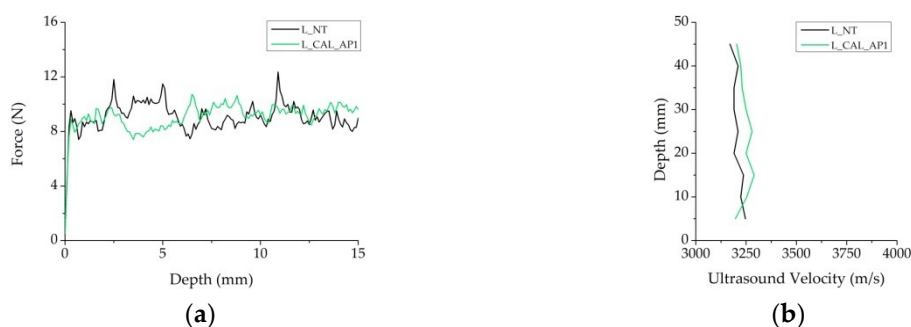

**Figure S3.** Lecce stone treated with CAL applied by brushing till saturation AP1 (L\_CAL\_API1): (a) drilling resistance and (b) UPV profile. NT: untreated part of the stone for DRMS and untreated stone for UPV.

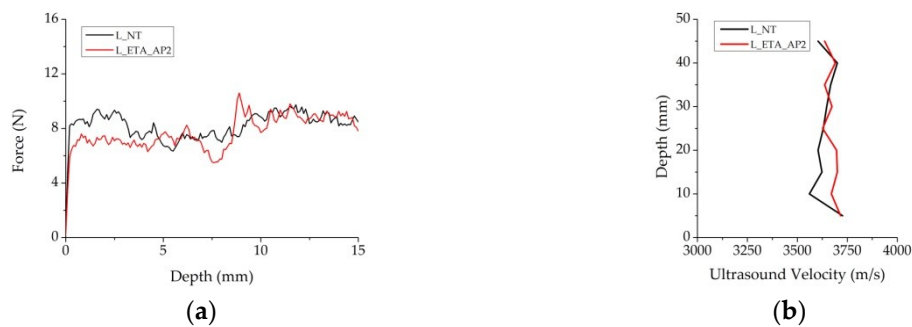

**Figure S4.** Lecce stone treated with ETA applied through absorption by capillarity AP2 (L\_ETA\_AP2): (a) drilling resistance and (b) UPV profile. NT: untreated part of the stone for DRMS and untreated stone for UPV.

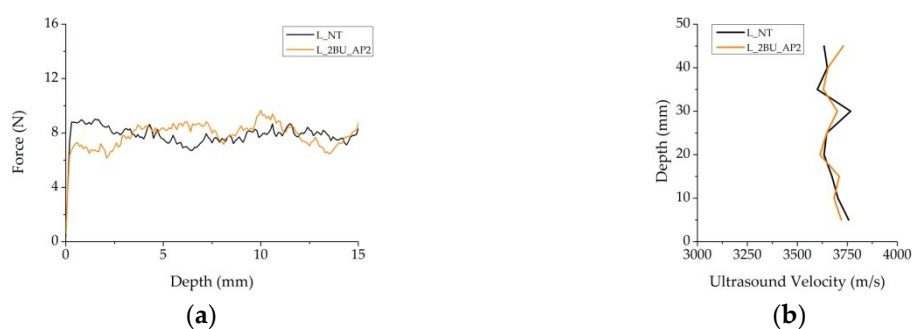

**Figure S5.** Lecce stone treated with 2BU applied through absorption by capillarity AP2 (L\_2BU\_AP2): (a) drilling resistance and (b) UPV profile. NT: untreated part of the stone for DRMS and untreated stone for UPV.

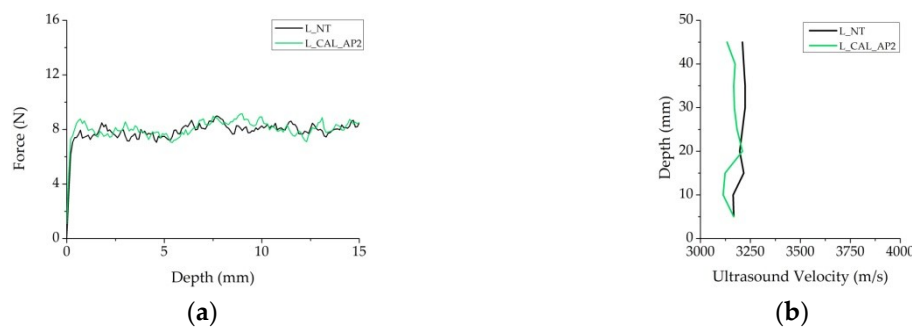

**Figure S6.** Lecce stone treated with CAL applied through absorption by capillarity AP2 (L\_CAL\_AP2): (a) drilling resistance and (b) UPV profile. NT: untreated part of the stone for DRMS and untreated stone for UPV.

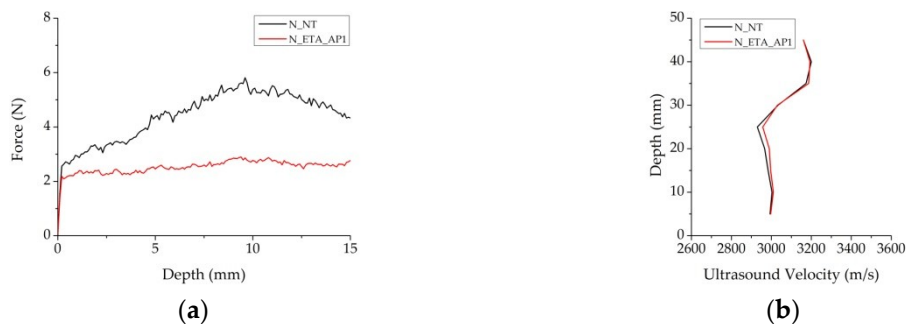

**Figure S7.** Noto stone treated with ETA applied by brushing till saturation AP1 (N\_ETA\_API): (a) drilling resistance and (b) UPV profile. NT: untreated part of the stone for DRMS and untreated stone for UPV.

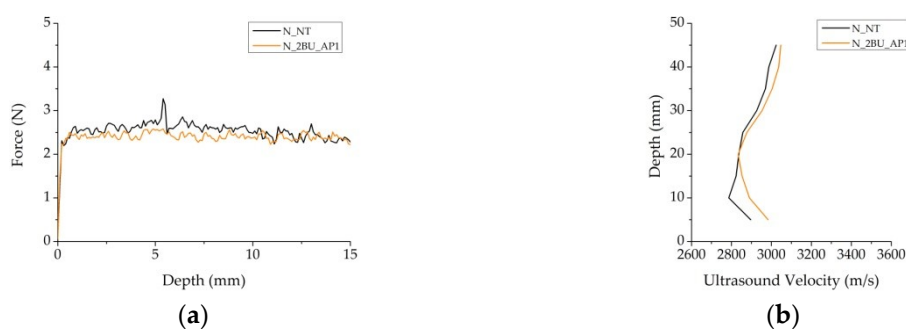

**Figure S8.** Noto stone treated with 2BU applied by brushing till saturation AP1 (N\_2BU\_API): (a) drilling resistance and (b) UPV profile. NT: untreated part of the stone for DRMS and untreated stone for UPV.

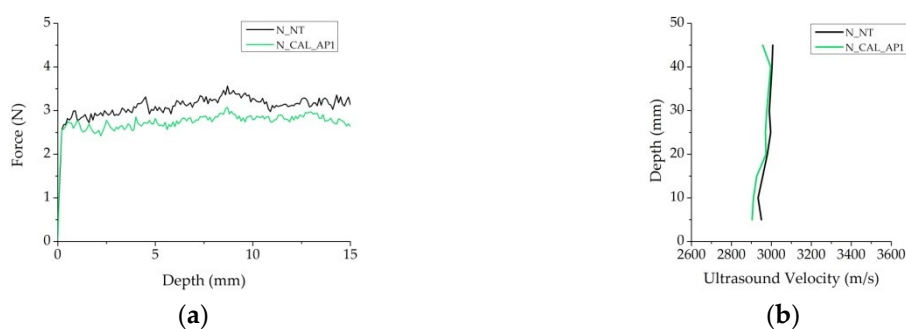

**Figure S9.** Noto stone treated with CAL applied by brushing till saturation AP1 (N\_CAL\_API): (a) drilling resistance and (b) UPV profile. NT: untreated part of the stone for DRMS and untreated stone for UPV.

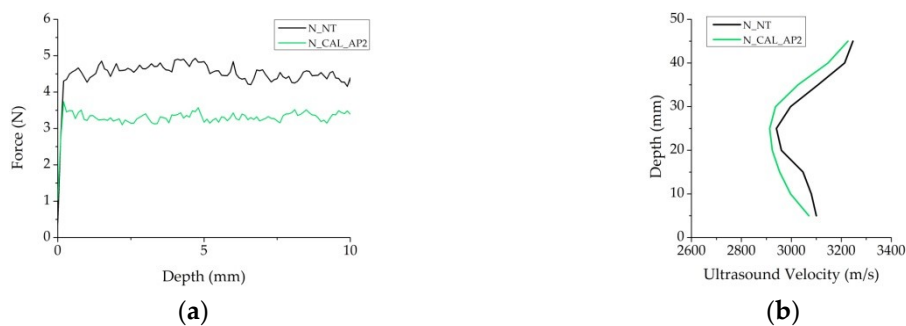

**Figure S10.** Noto stone treated with CAL applied through absorption by capillarity AP2 (N\_CAL\_AP2): (a) drilling resistance and (b) UPV profile NT: untreated part of the stone for DRMS and untreated stone for UPV.

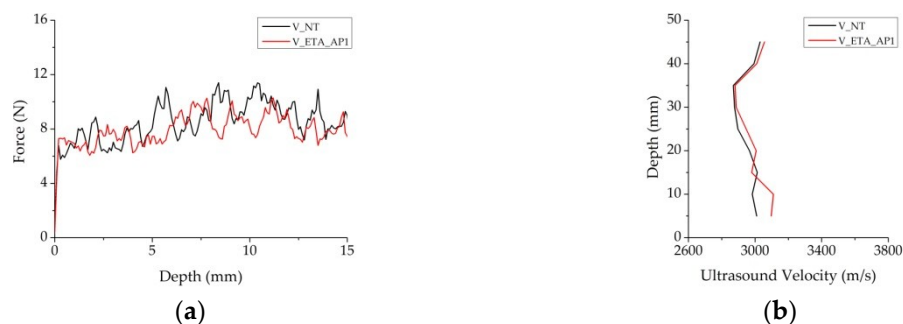

**Figure S11.** Vicenza stone treated with ETA applied by brushing till saturation AP1 (V\_ETA\_AP1): (a) drilling resistance and (b) UPV profile NT: untreated part of the stone for DRMS and untreated stone for UPV.

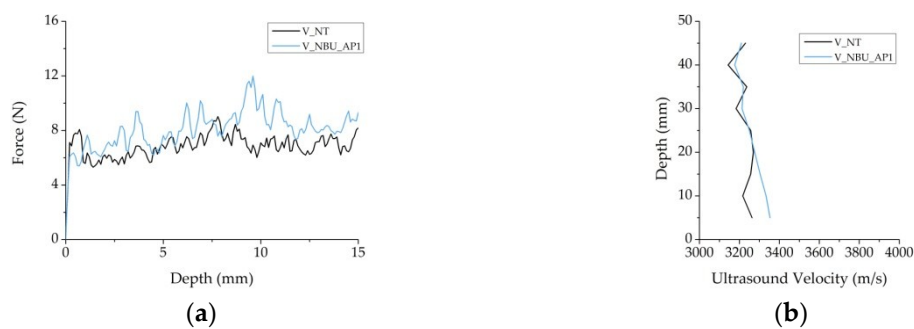

**Figure 12.** Vicenza stone treated with NBU applied by brushing till saturation AP1 (V\_NBU\_AP1): (a) drilling resistance and (b) UPV profile. NT: untreated part of the stone for DRMS and untreated stone for UPV.

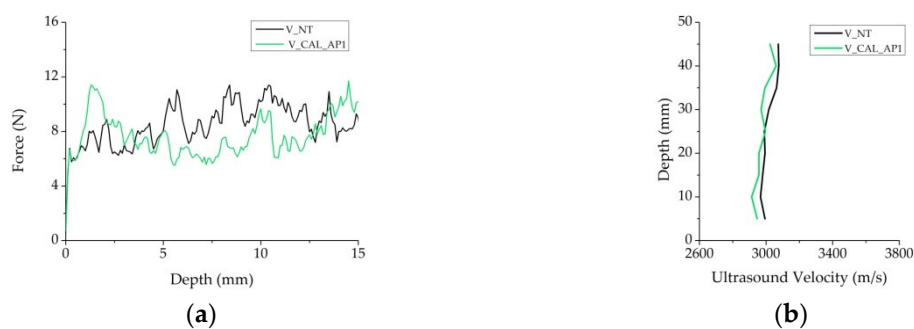

**Figure S13.** Vicenza stone treated with CAL applied by brushing till saturation AP1 (V\_CAL\_AP1): (a) drilling resistance and (b) UPV profile NT: untreated part of the stone for DRMS and untreated stone for UPV.

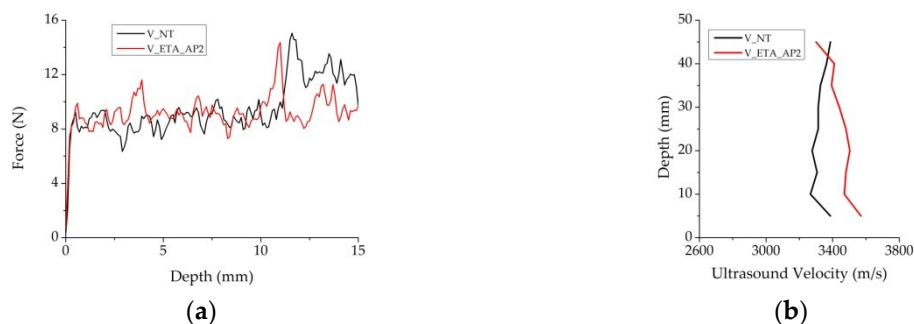

**Figure S14.** Vicenza stone treated with ETA applied through absorption by capillarity AP2 (V\_ETA\_AP2): (a) drilling resistance and (b) UPV profile. NT: untreated part of the stone for DRMS and untreated stone for UPV.

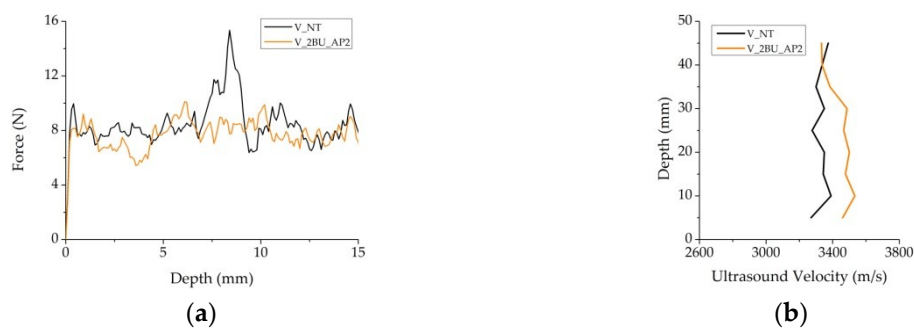

**Figure S15.** Vicenza stone treated with 2BU applied through absorption by capillarity AP2 (V\_2BU\_AP2): (a) drilling resistance and (b) UPV profile. NT: untreated part of the stone for DRMS and untreated stone for UPV.



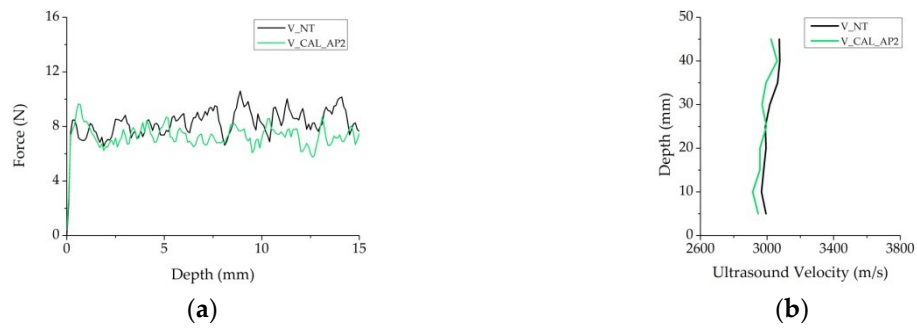

**Figure S16.** Vicenza stone treated with CAL applied through absorption by capillarity AP2 (V\_CAL\_AP2): (a) drilling resistance and (b) UPV profile. NT: untreated part of the stone for DRMS and untreated stone for UPV.
